# Supplementary material
Source: ML conference proceedings conference paper supplement (https://aclanthology.org/W16-6203)
Supplement: Attachment [file classes.pdf › leave-modeling-participation-3/classes.pdf]

■ Social words   ■ Cognition words   ■ Affect words   ■ Positive emotion words   ■ Negative emotion words
