# Supplementary material
Source: ML conference proceedings conference paper supplement (https://aclanthology.org/W16-6203)

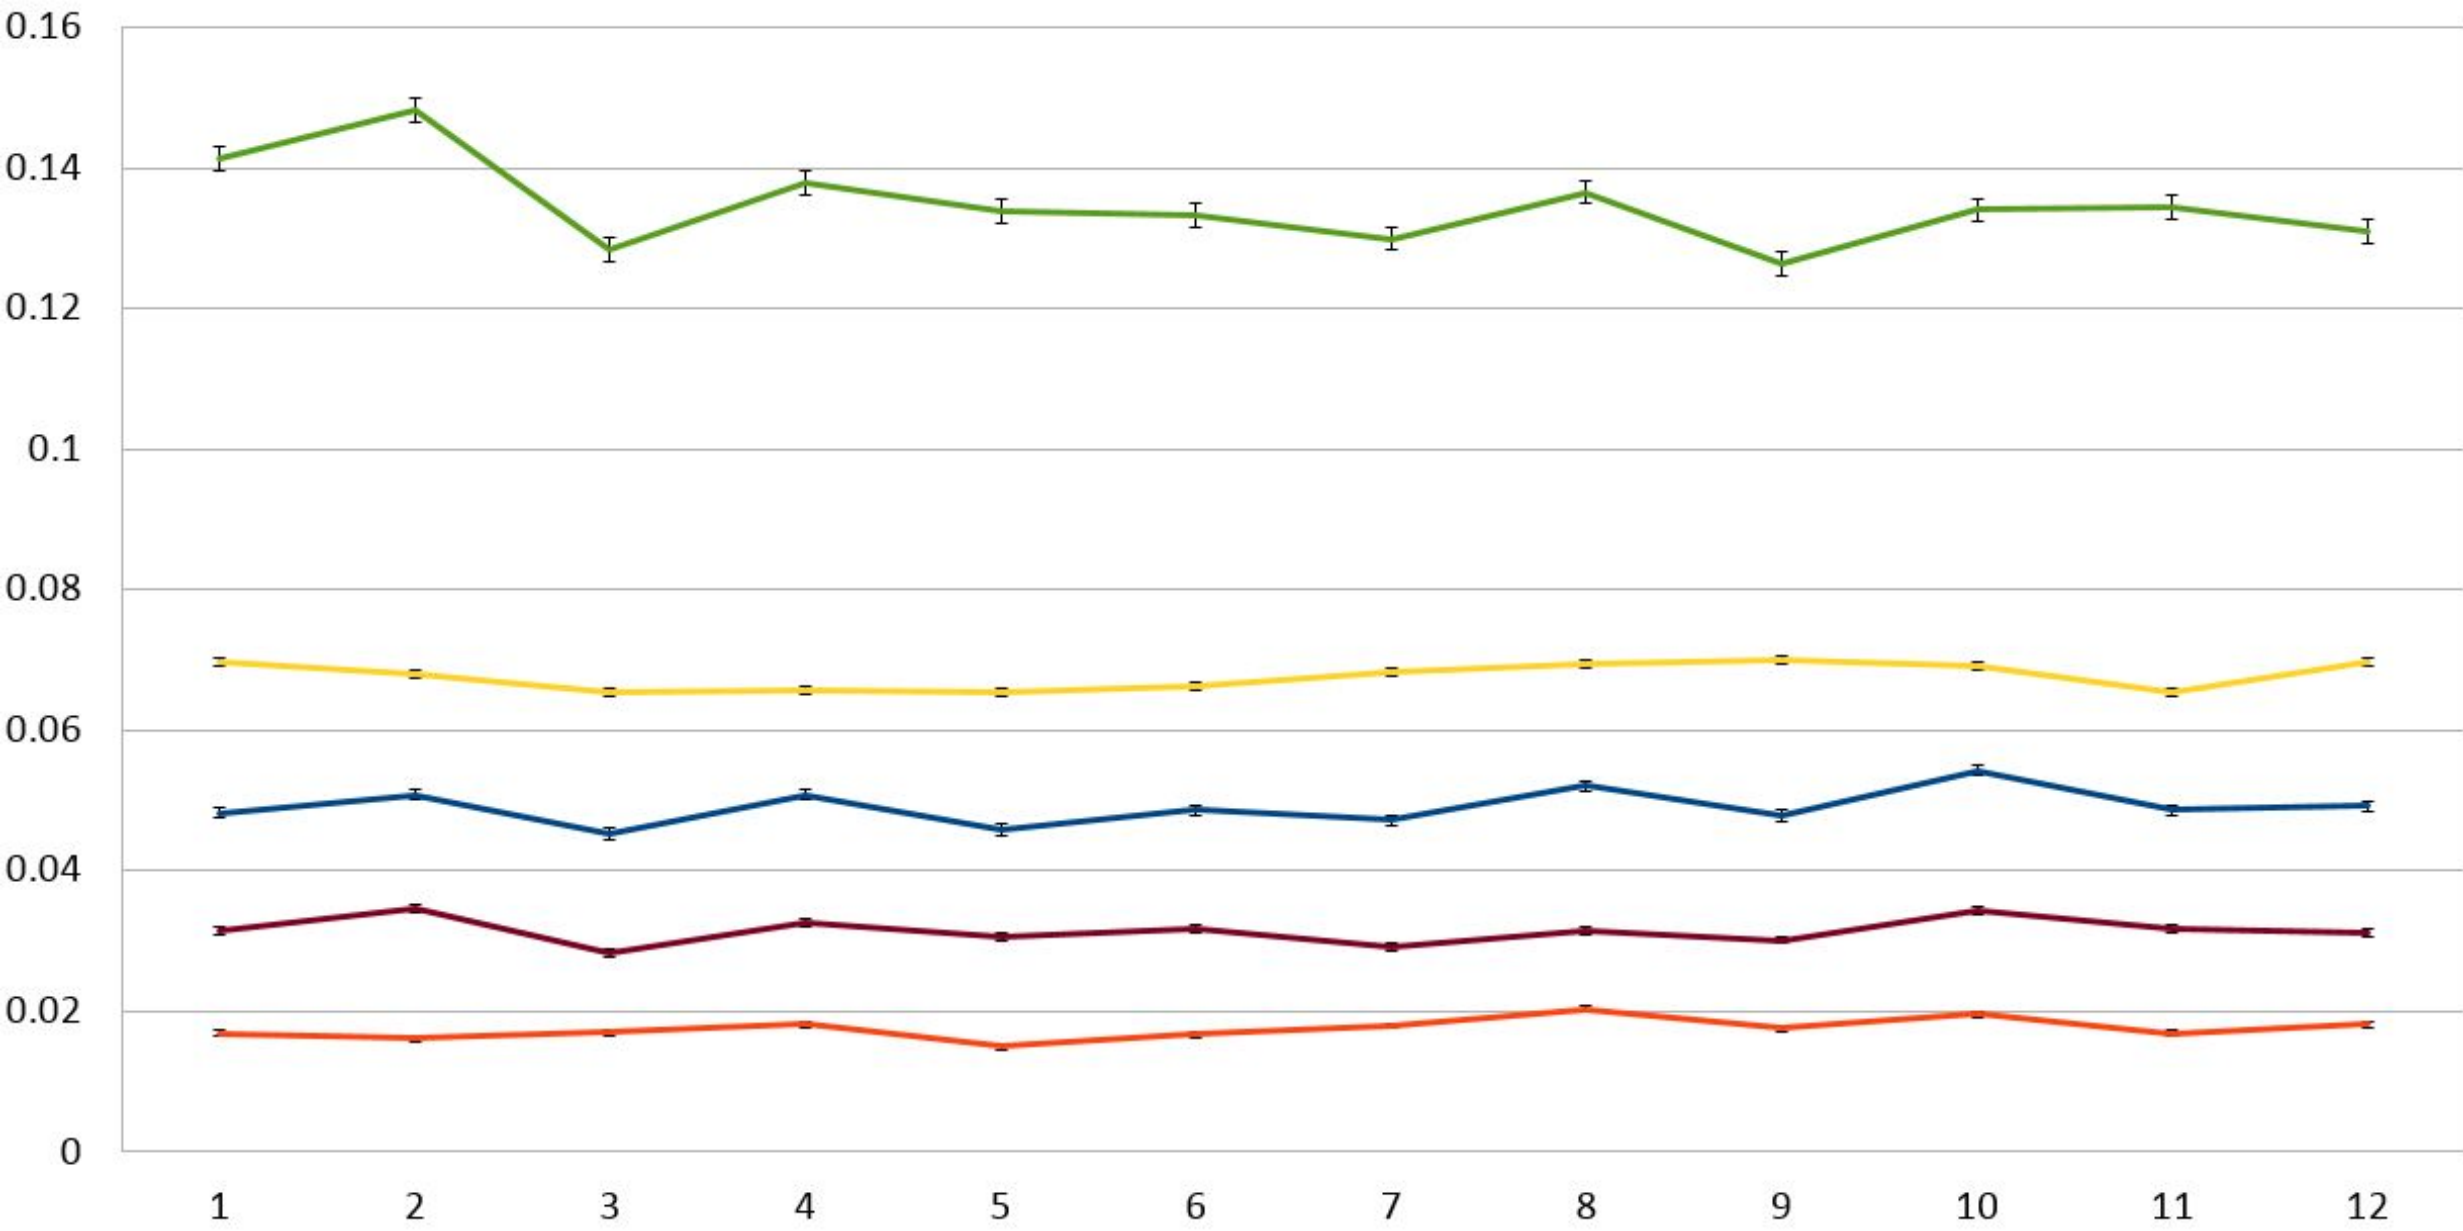

Supplement: Attachment [file BN101.pdf › leave-modeling-participation-3/BN101.pdf]

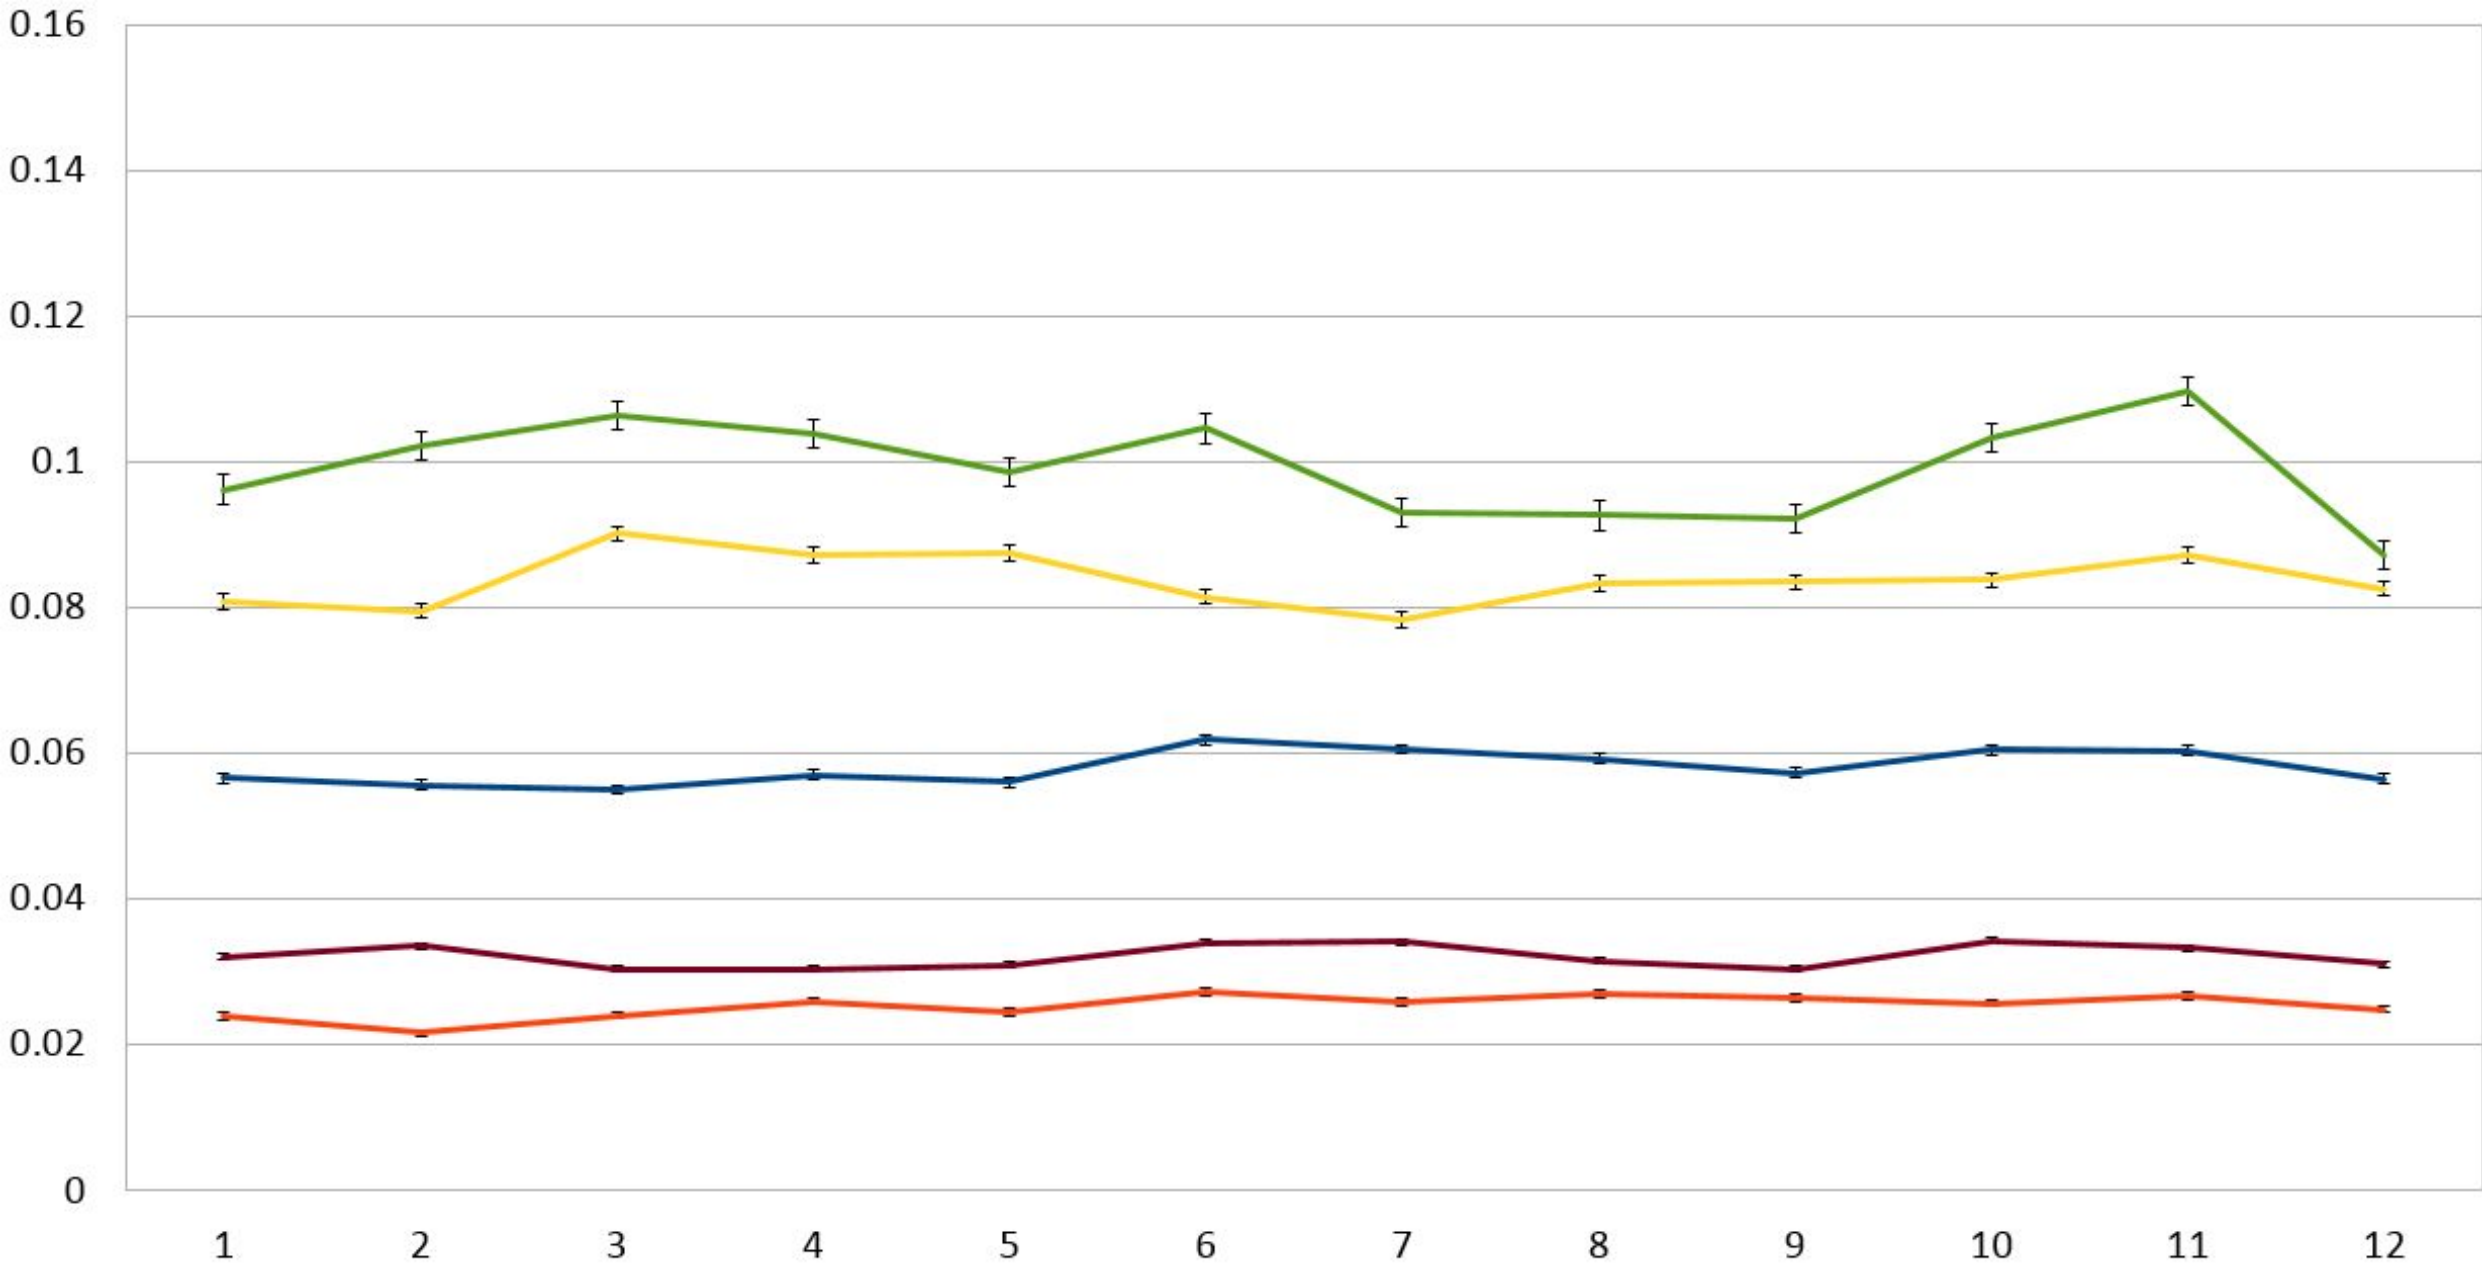

Supplement: Attachment [file DEP101.pdf › leave-modeling-participation-3/DEP101.pdf]

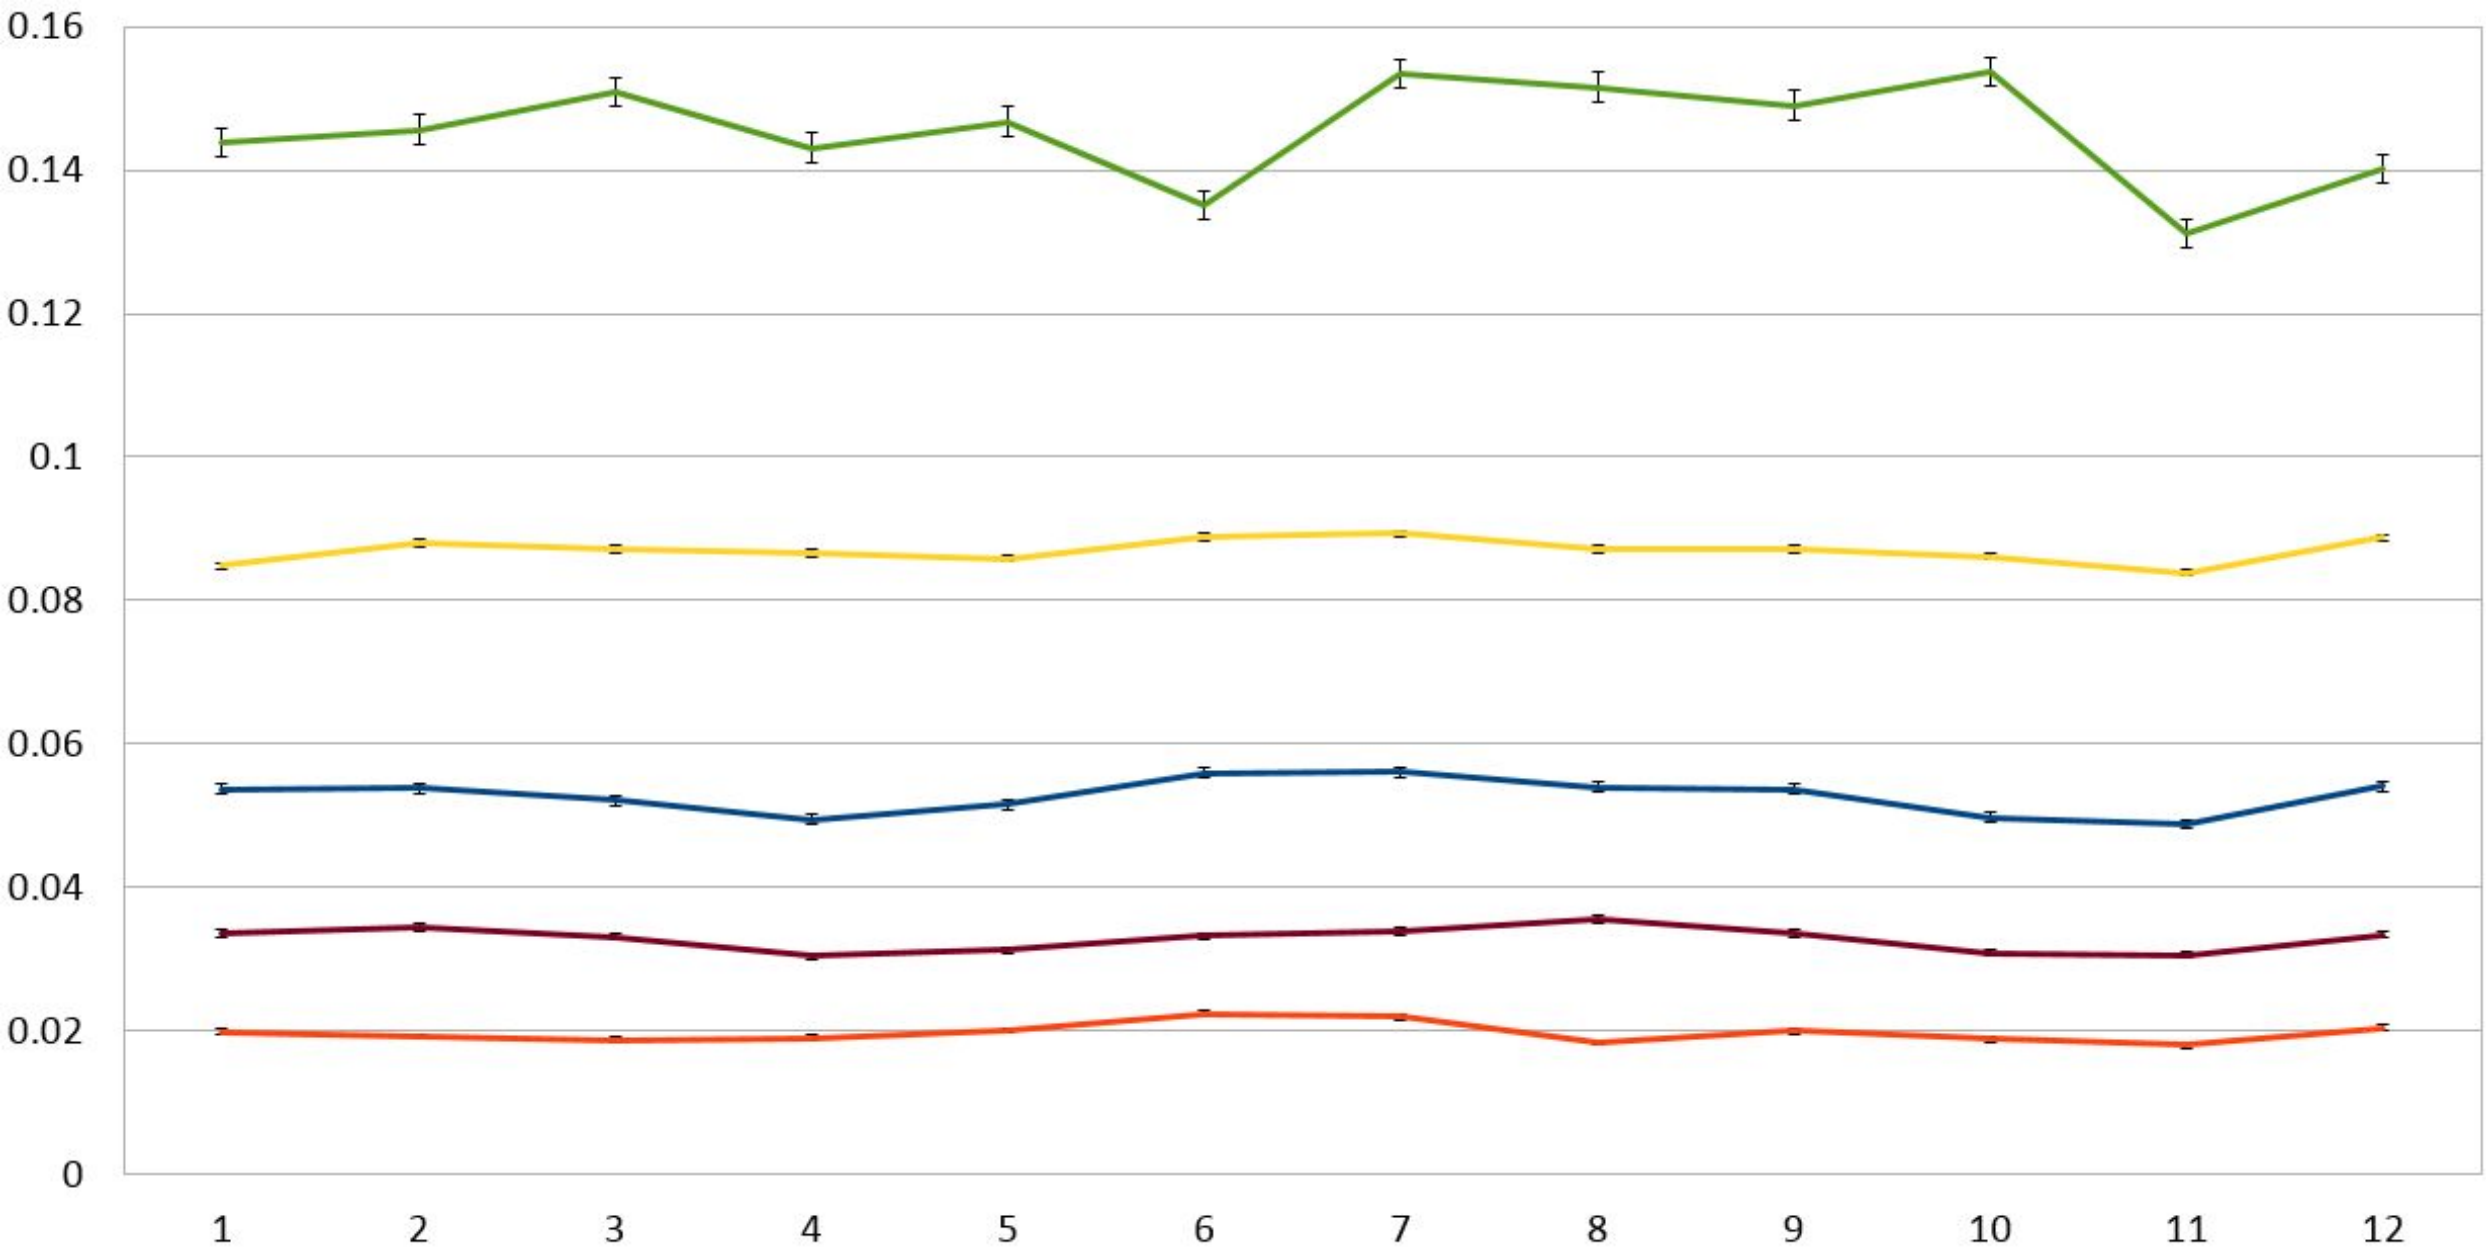

Supplement: Attachment [file RH101-nl.pdf › leave-modeling-participation-3/RH101-nl.pdf]

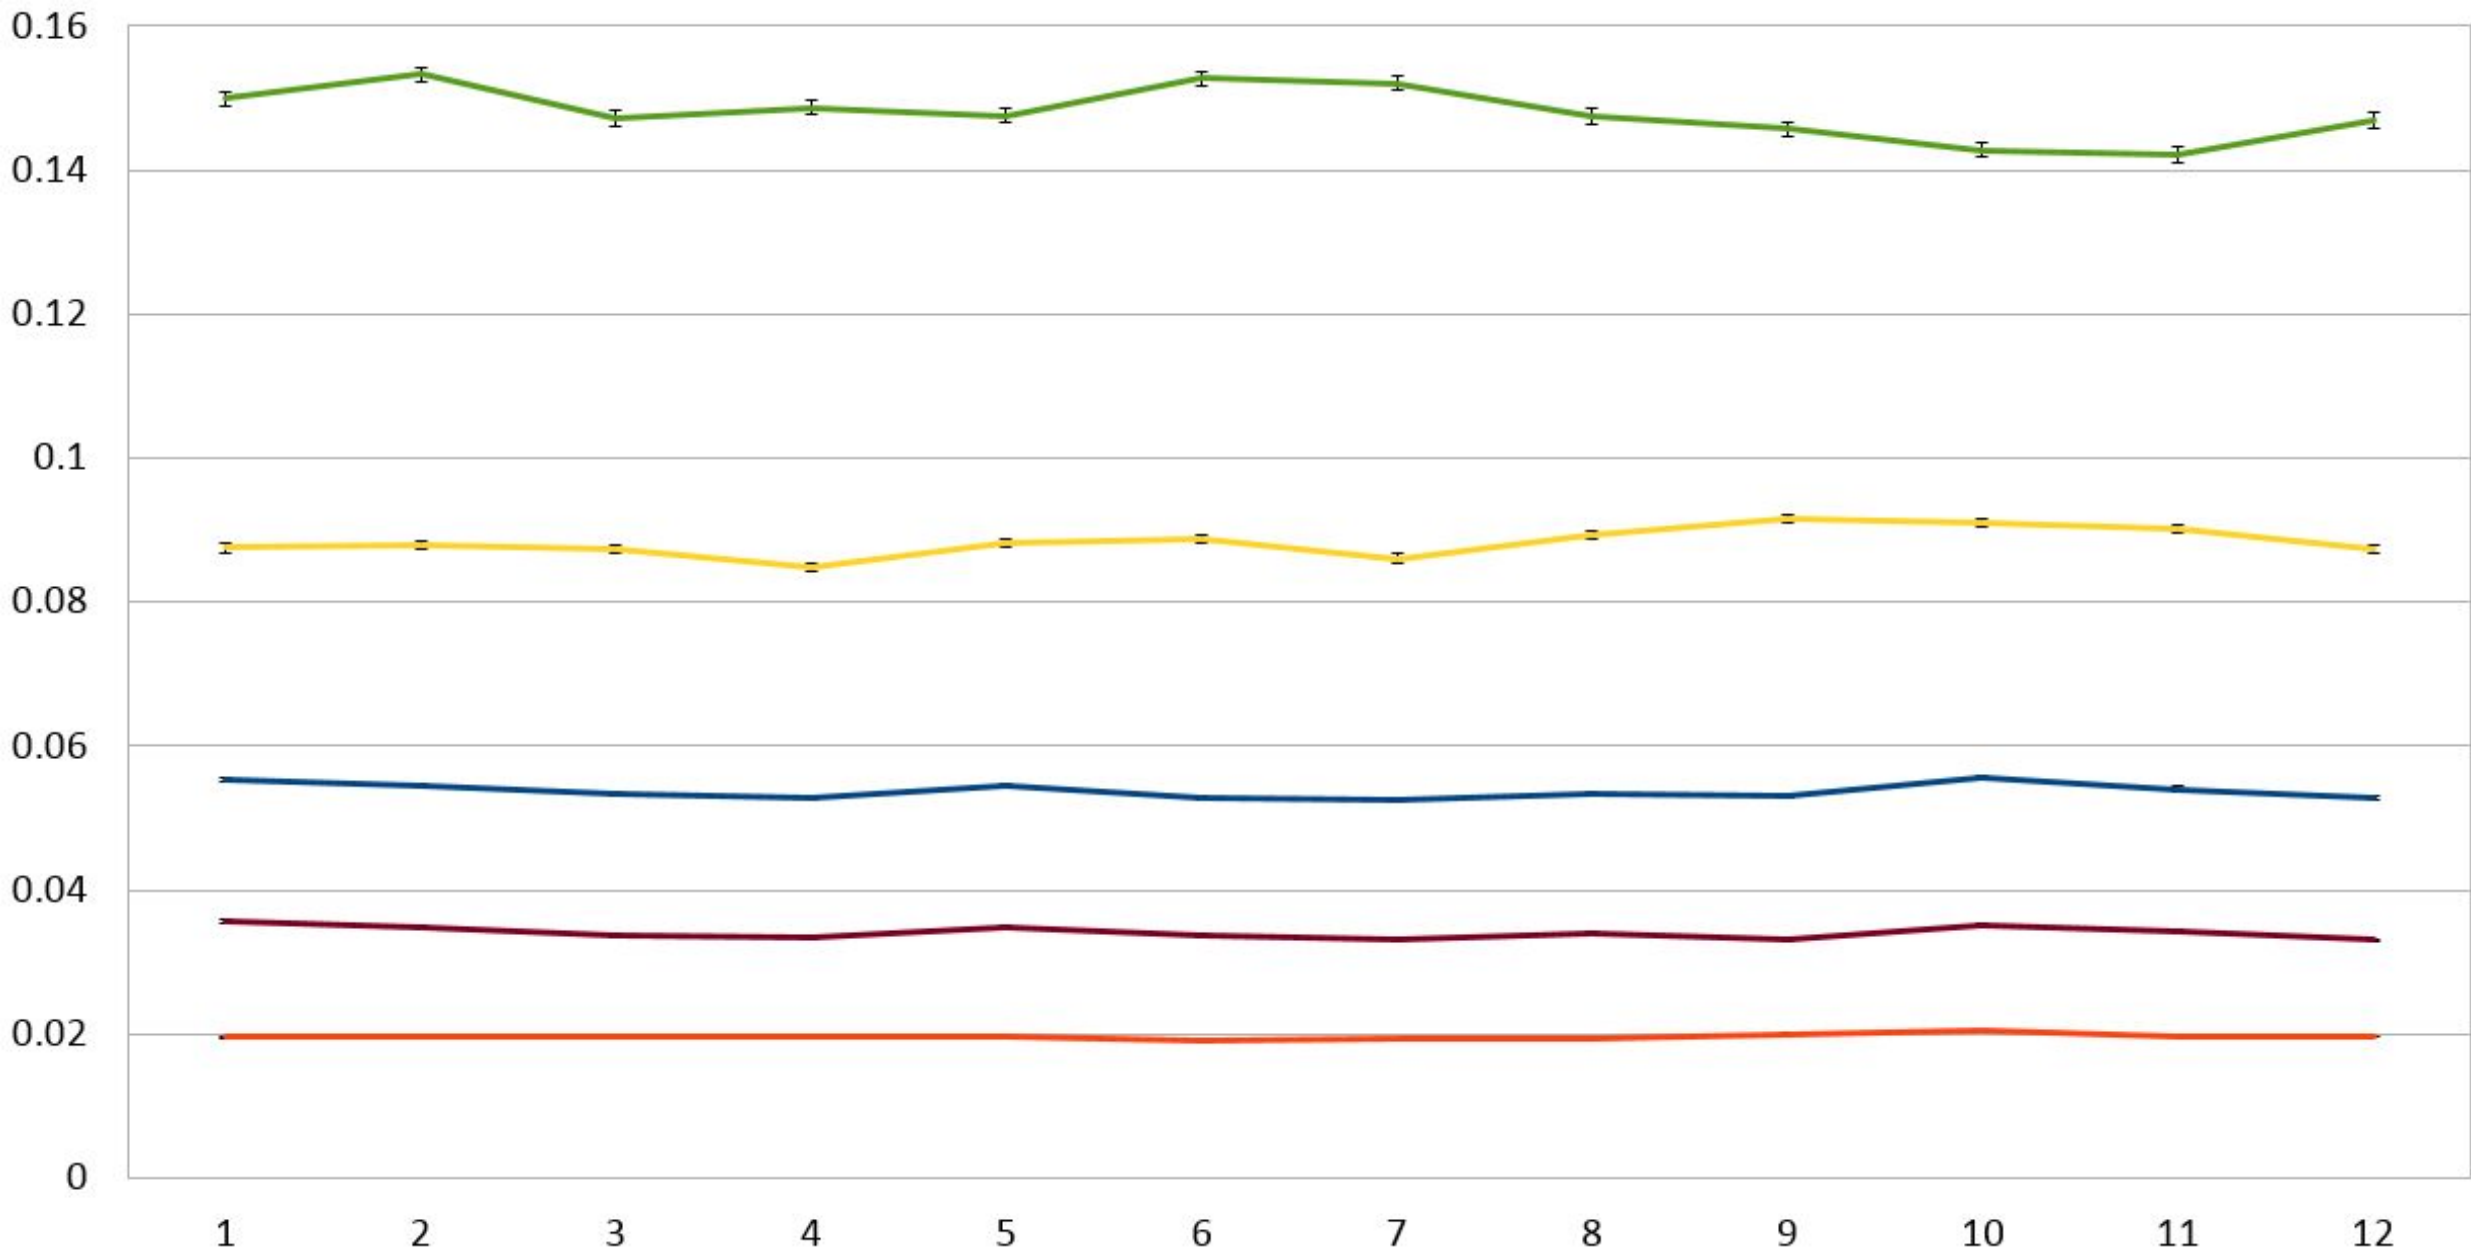

Supplement: Attachment [file RH101.pdf › leave-modeling-participation-3/RH101.pdf]

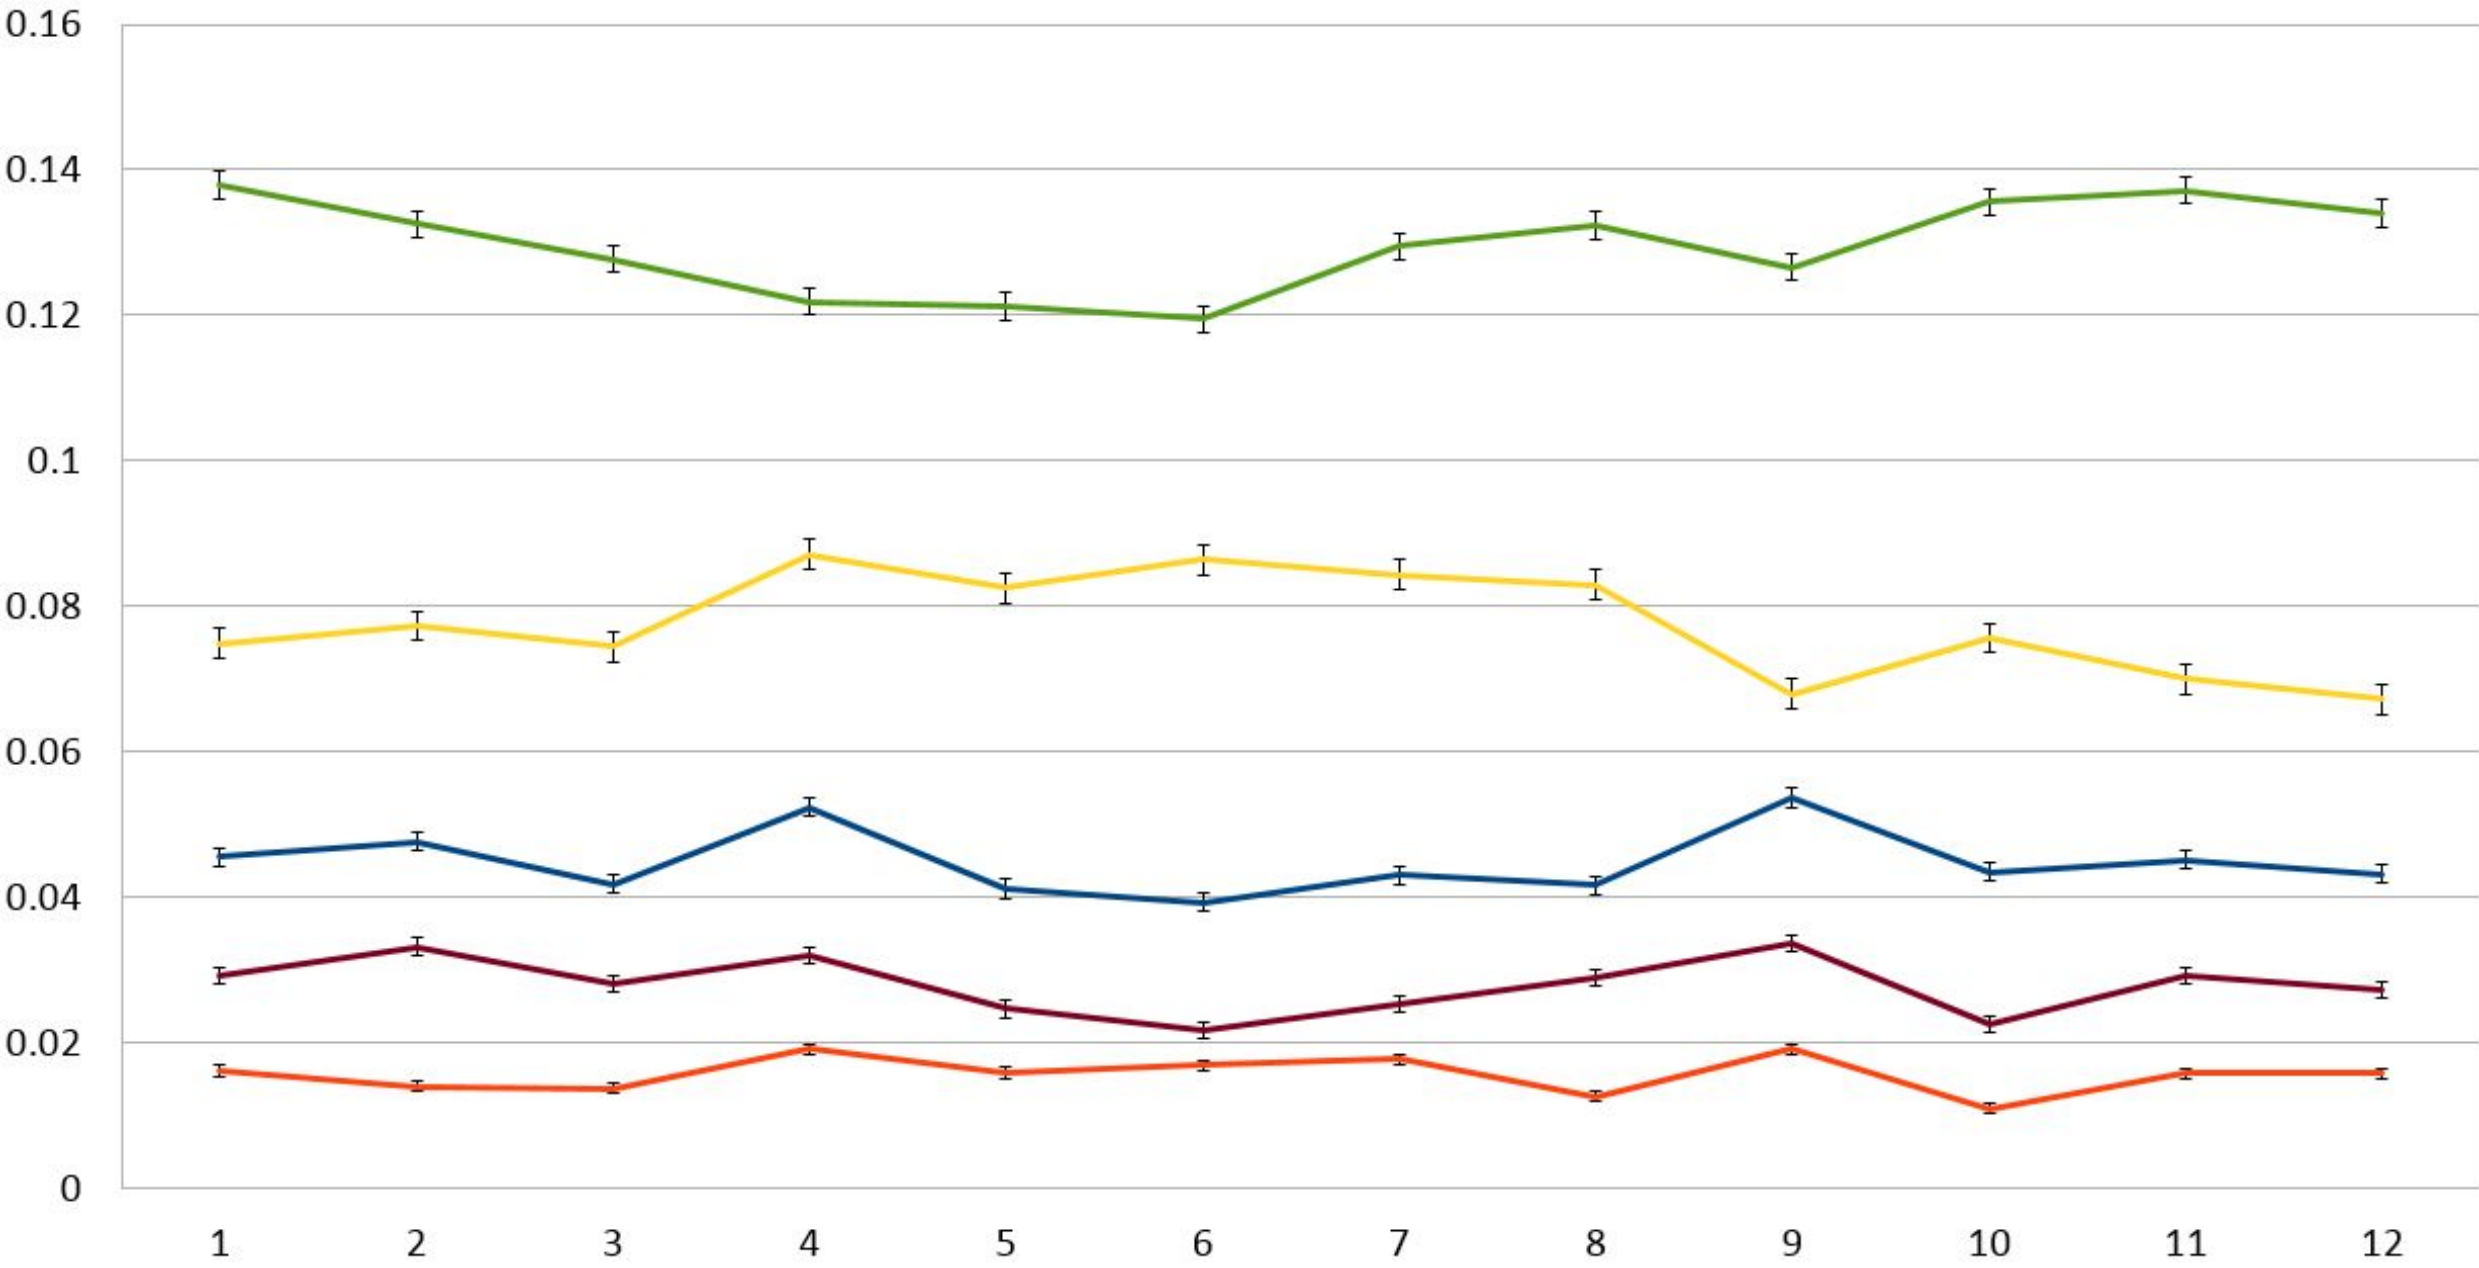

Supplement: Attachment [file bn101-nl.pdf › leave-modeling-participation-3/bn101-nl.pdf]

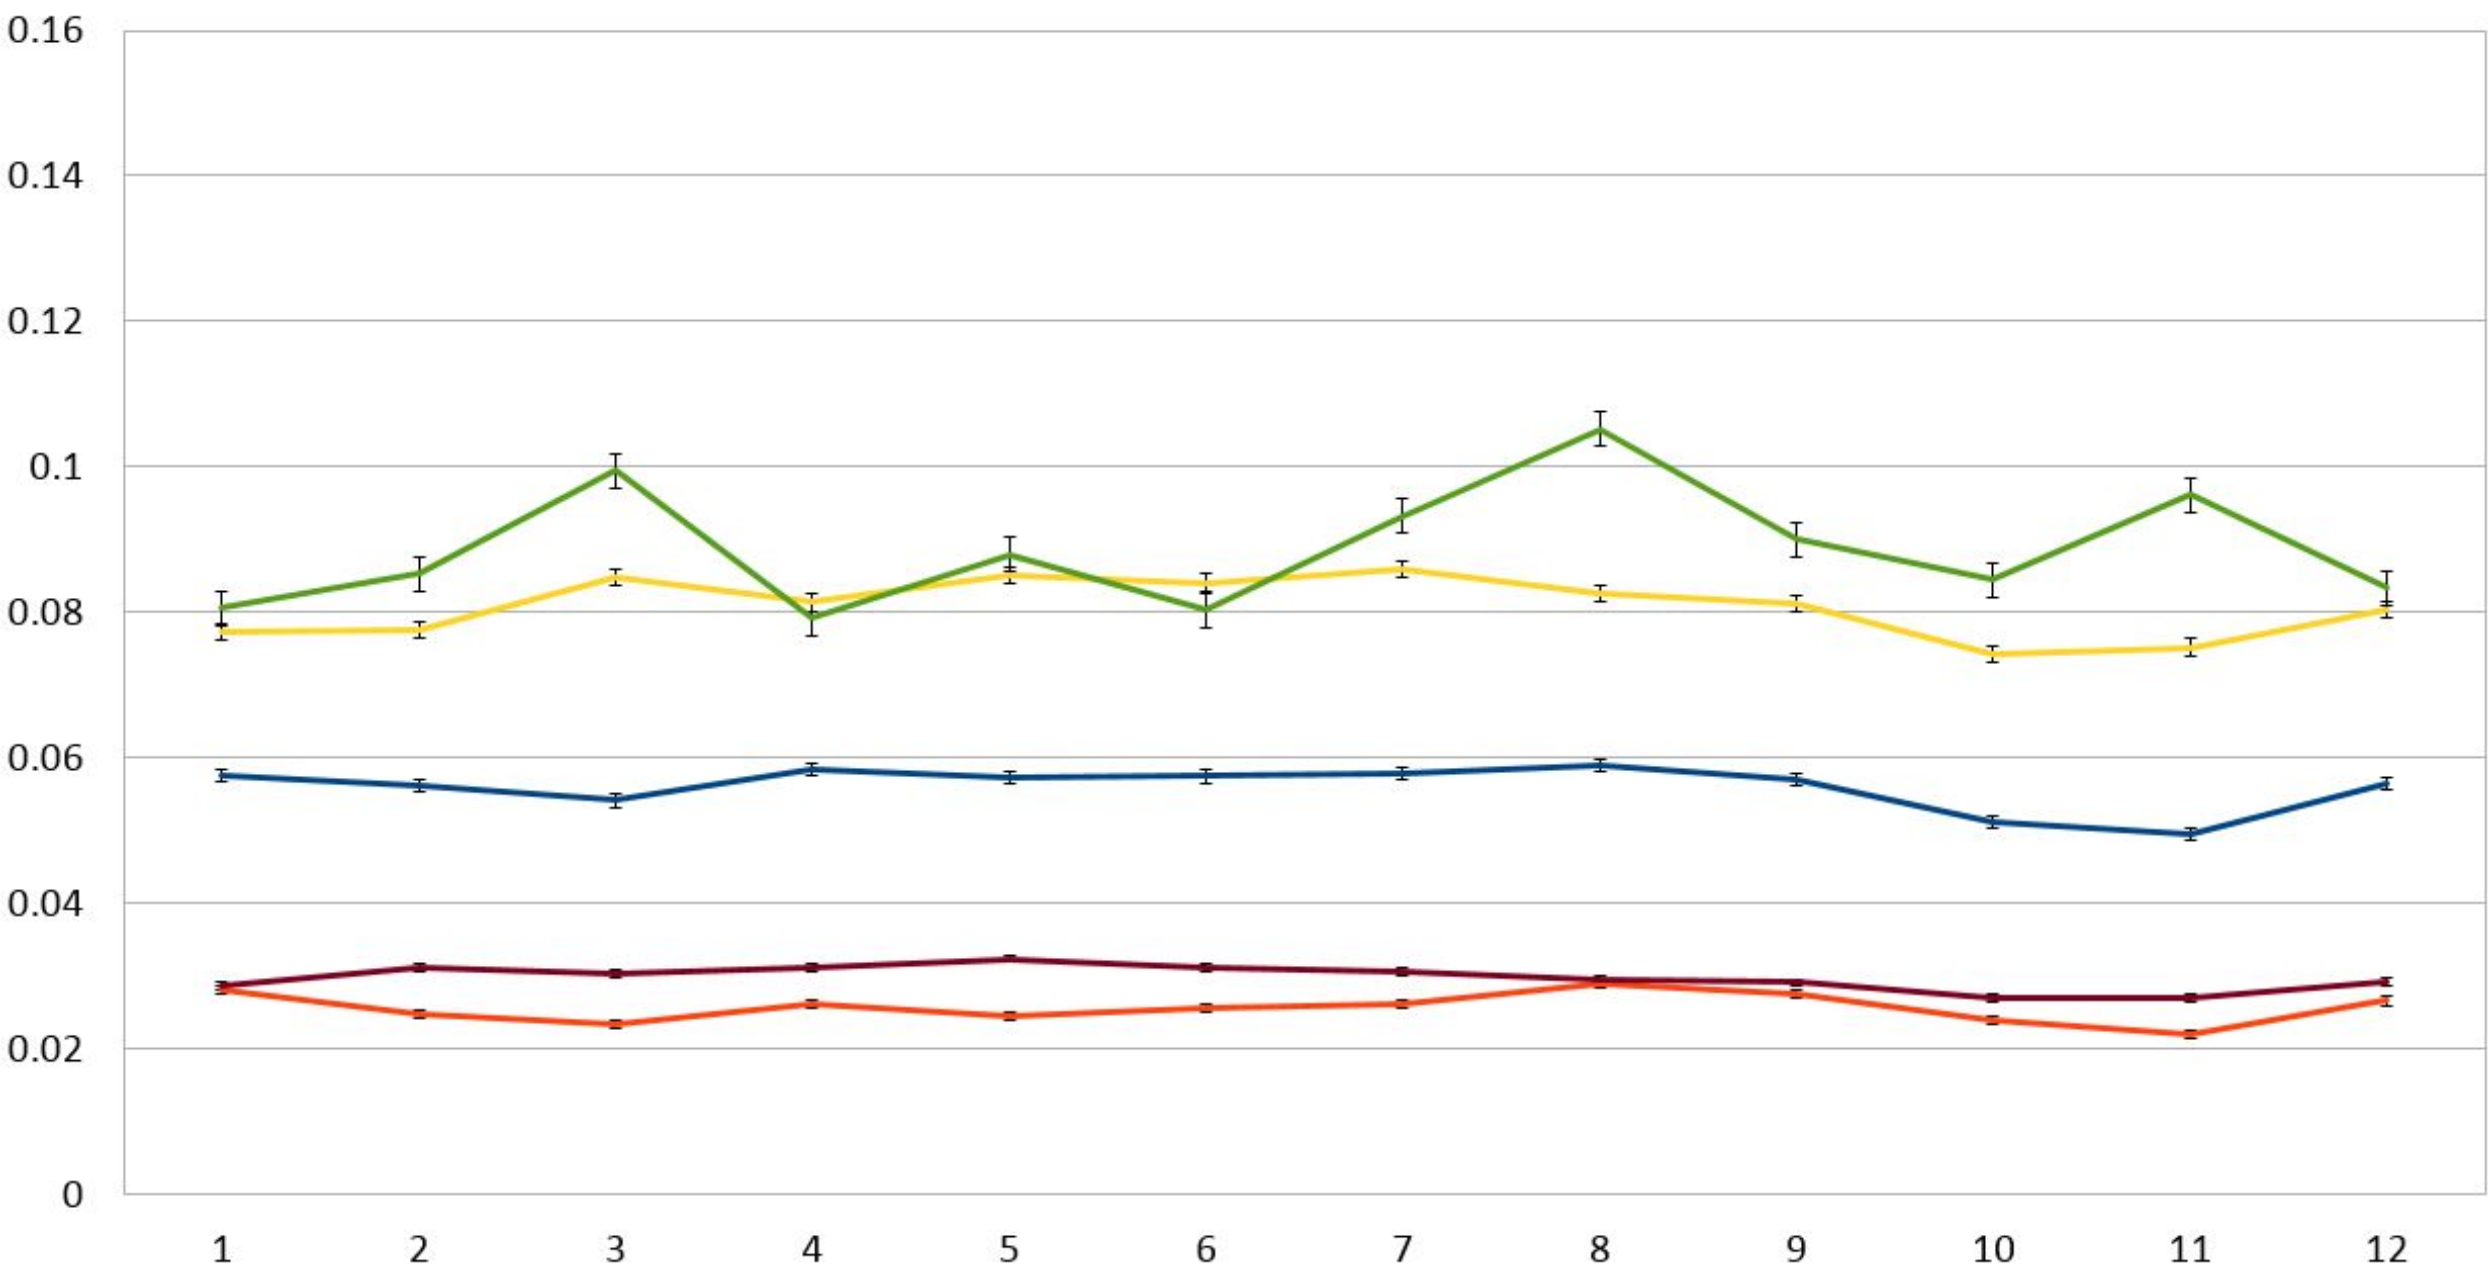

Supplement: Attachment [file dep101-nl.pdf › leave-modeling-participation-3/dep101-nl.pdf]
